# Supplementary material for: Time-resolved compound repositioning predictions on a text-mined knowledge network
Source: bioRxiv or medRxiv preprint supplement (doi:10.1101/625459), 2019-05-08
Supplement: Supplementary file [file media-1.pdf]

## Supplemental Figures

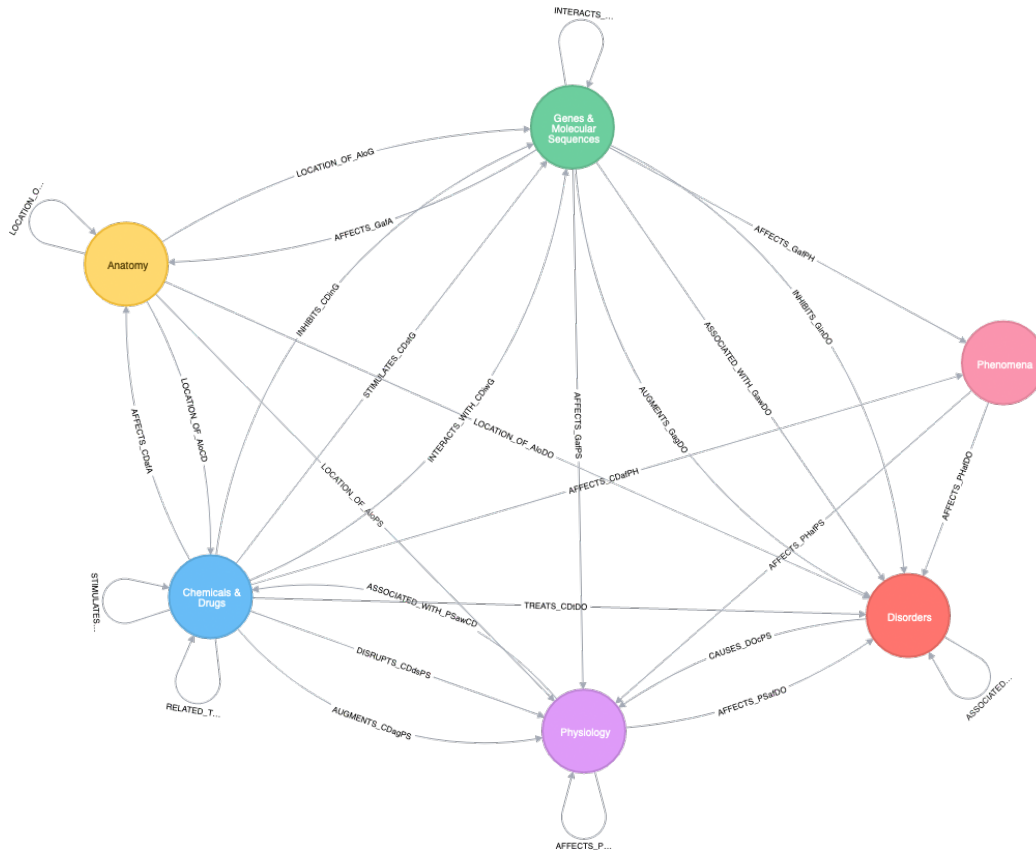

Supplemental Figure S1) Metagraph of SemMedDB hetnet data model.

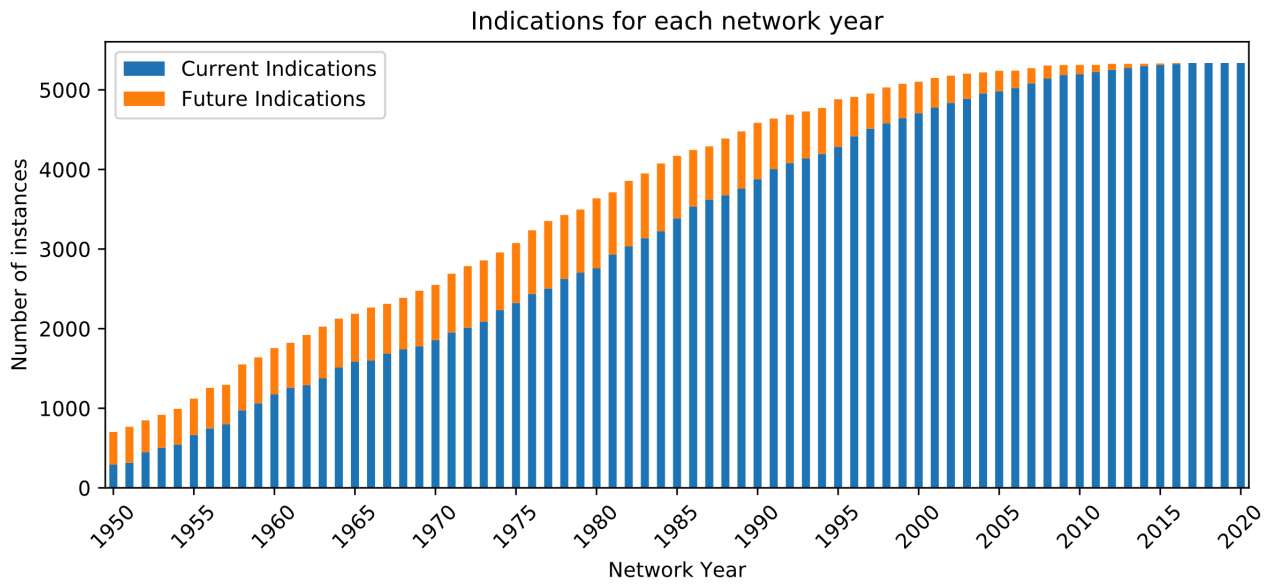

Supplemental Figure S2) Number of indications mappable to each network year, split by approval year, with current indications mean those approved up-to and including the network year, and future those approved after the network year.

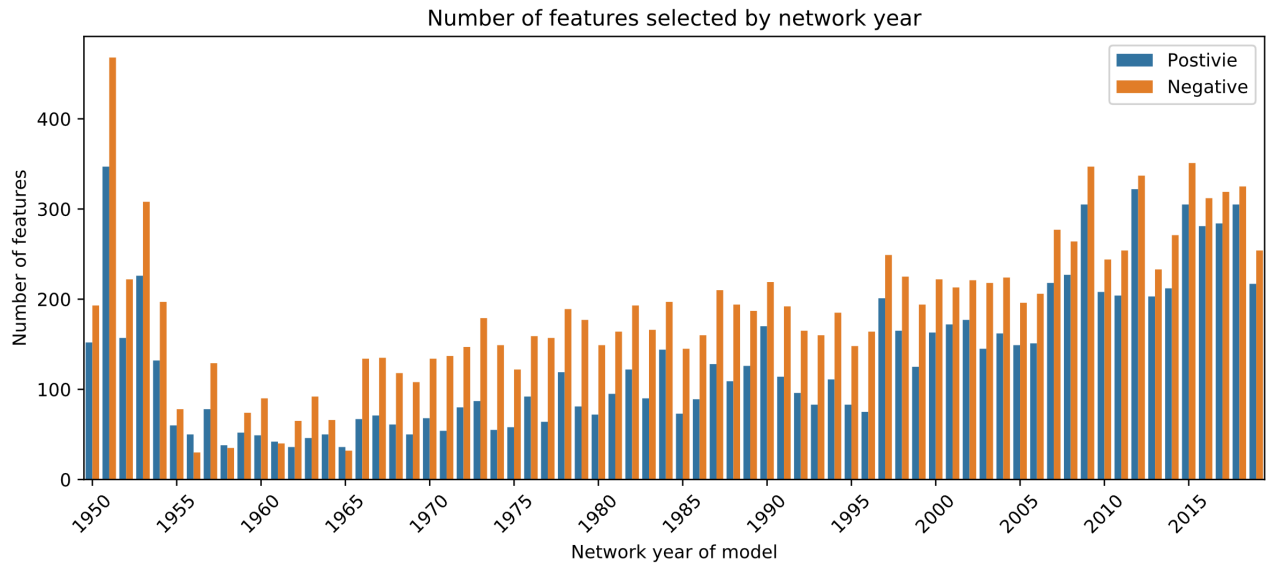

**Supplemental Figure S3)** Number of features selected in the models for each of the different network years.

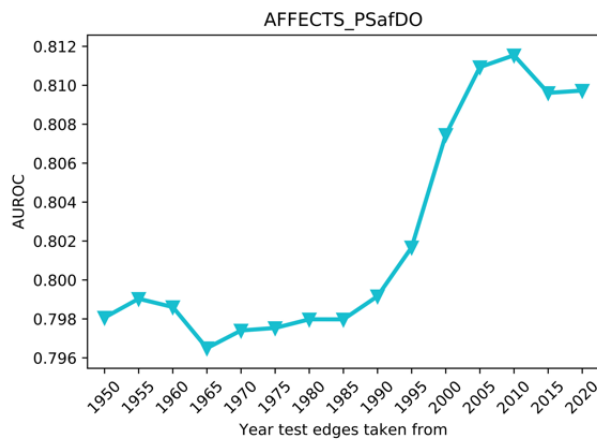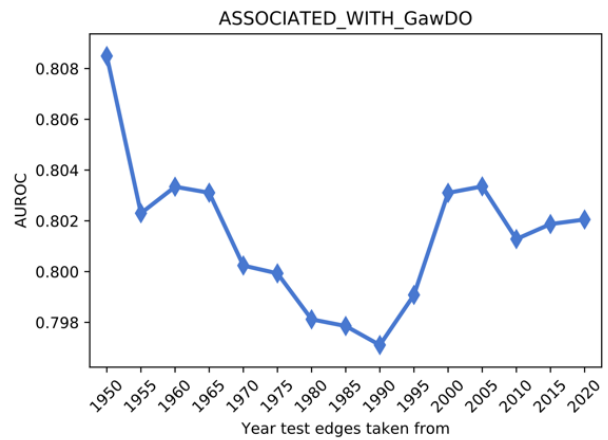

**Supplemental Figures S4 & S5)** Edge substitution analysis results for edges AFFECTS\_PSafDO and ASSOCIATED\_WITH\_GawDO respectively.
